# Supplementary material for: Use of New Technologies in the Prevention of Suicide in Europe: An Exploratory Study
Source: PubMed Central journal article supplement (PMC5506332; doi:10.2196/mental.7716), 2017-06-27
Supplement: mental_v4i2e23_app1.pdf [file mental_v4i2e23_app1.pdf]

| Category                                                                      | Subcategory                                                                                                                               |
|-------------------------------------------------------------------------------|-------------------------------------------------------------------------------------------------------------------------------------------|
| <b>1. Decision and Policy Makers</b>                                          | 1a. European networks focusing on mental health promotion.                                                                                |
|                                                                               | 1b. Decision and policy makers from local and regional authorities (dealing with mental health, care, welfare, family matters, youth...). |
|                                                                               | 1c. Decision and policy makers in public health institutions (eg, mental health care centers, hospitals).                                 |
|                                                                               | 1d. Private companies influencing policy (eg, health insurance).                                                                          |
|                                                                               | 1e. Media.                                                                                                                                |
|                                                                               | 1f. Educational setting, policy makers.                                                                                                   |
|                                                                               | 1g. Professionals working in financial services and human resources.                                                                      |
| <b>2. Mental Health Professionals (youth, adult and elderly focused MHPs)</b> | 2a. General practitioners.                                                                                                                |
|                                                                               | 2b. Psychologists (inpatient, outpatient).                                                                                                |
|                                                                               | 2c. Psychiatrists (inpatient, outpatient).                                                                                                |
|                                                                               | 2d. Emergency physicians (on call doctors in Accident & Emergency).                                                                       |
|                                                                               | 2e. Nursing staff who work with suicidal patient (primary health nurse, mental health nurse, emergency room nurse).                       |
|                                                                               | 2f. Rescue personnel (paramedic – ambulance crew).                                                                                        |
|                                                                               | 2g. Work setting, e.g. private companies and prevention advisors in occupational medicine.                                                |
|                                                                               | 2h. Educational setting, eg, schools, school counselors.                                                                                  |

|                             |                                                                                                                                |
|-----------------------------|--------------------------------------------------------------------------------------------------------------------------------|
| <b>3. NGOs/ Social Area</b> | 3a. Professionals in the social area (community social workers, home help workers, youth workers, social welfare services).    |
|                             | 3b. Staff of NGOs and agencies working in the following areas: youth, marital counseling, family and life counseling, welfare. |
|                             | 3c. Educational setting: teachers.                                                                                             |
|                             | 3d. Staff of suicide helplines.                                                                                                |
|                             | 3e. Representatives of religious group.                                                                                        |
|                             | 3f. Support groups with survivors.                                                                                             |
|                             | 3g. Work setting: employers, human resources, union representatives.                                                           |
|                             | 3h. Criminal justice stakeholders (eg, police, penitentiary police, coroners...).                                              |
|                             | 3i. Pharmacists.                                                                                                               |
